# Supplementary material for: Preparation, electronic structure and photoluminescence properties of RE (RE = Ce, Yb)-activated SrAlSi4N7 phosphors
Source: Royal Society of Chemistry journal article supplement (doi:10.1039/c3tc31628a), 2013-01-01
Supplement: c3tc31628a.pdf [file c3tc31628a.pdf]

## Supporting information

### Preparation, Electronic structure and Photoluminescence properties of RE (RE = Ce, Yb) -activated SrAlSi<sub>4</sub>N<sub>7</sub> yellow-red emitting phosphors for white-LEDs

Zhijun Zhang,<sup>ab\*</sup> Otmar. M. ten Kate,<sup>bc</sup> Anneke. C. A. Delsing,<sup>b</sup> Zhenyong Man,<sup>a</sup> Rongjun Xie,<sup>d</sup> Yufang Shen,<sup>e</sup> Marjo. J. H. Stevens,<sup>b</sup> Peter. H. L. Notten,<sup>b</sup> Pieter Dorenbos,<sup>c\*</sup> Jingtai Zhao,<sup>a</sup> Hubertus. T. Hintzen,<sup>b</sup>

<sup>a</sup> Key Laboratory of Transparent Opto-Functional Inorganic Materials of Chinese Academy of Sciences, Shanghai Institute of Ceramics, Shanghai, 200050, P. R. China.

<sup>b</sup> Energy Materials and Devices, Department of Chemical Engineering and Chemistry, Eindhoven University of Technology, P.O. Box 513, 5600 MB Eindhoven, the Netherlands.

<sup>c</sup> Luminescent Materials Research Group, Delft University of Technology, Mekelweg 15, 2629 JB Delft, the Netherlands.

<sup>d</sup> Nitride Particle Group, Nano Ceramics Center, National Institute for Materials Science, Namiki 1-1, Tsukuba, Ibaraki 305-0044, Japan

<sup>e</sup> Key Laboratory of New Processing Technology for Nonferrous Metals and Materials, Ministry of Education, Guilin University of Technology, Guilin 541004, P. R. China

#### AUTHOR INFORMATION

Corresponding Author

Dr. Z. J. Zhang  
Shanghai Institute of Ceramics, Chinese Academy of Sciences  
1295 Dingxi, Shanghai, 200050  
Tel: +86-21-52412620  
Fax: +86-21-52413122  
E-mail : [zhangzj@mail.sic.ac.cn](mailto:zhangzj@mail.sic.ac.cn)

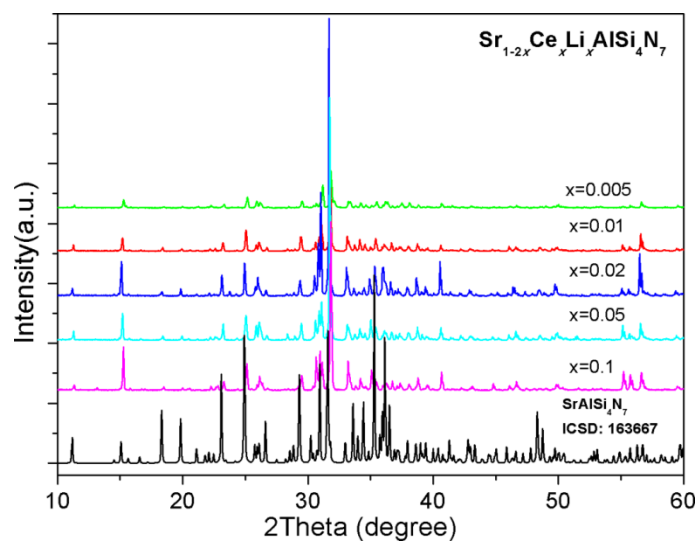

Fig. 1s Powder X-ray diffraction patterns of  $\text{Sr}_{1-2x}\text{Ce}_x\text{Li}_x\text{AlSi}_4\text{N}_7$  ( $0 \leq x \leq 0.1$ ).

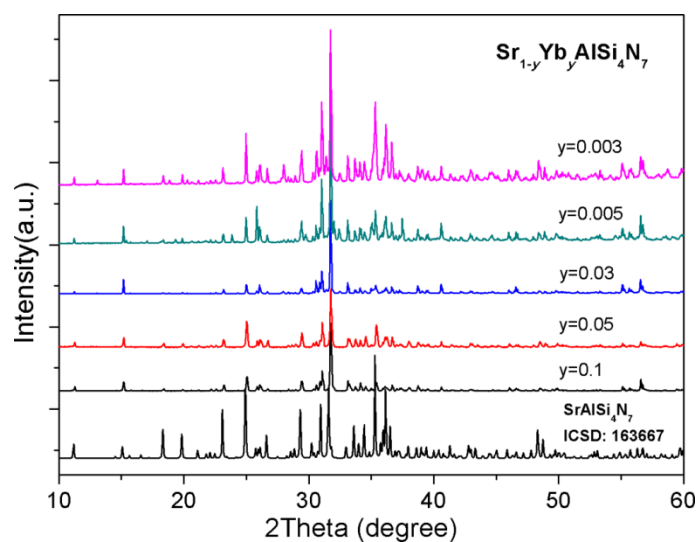

Fig. 2s Powder X-ray diffraction patterns of  $\text{Sr}_{1-y}\text{Yb}_y\text{AlSi}_4\text{N}_7$  ( $0 \leq y \leq 0.1$ ).
